# Supplementary material
Source: Copernicus journal article supplement (doi:10.5194/bg-23-3567-2026)
Supplement: Supplementary file 1 [file bg-23-3567-2026-supplement.pdf]

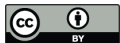

*Supplement of*

**The effects of peat thickness and water table depth on  
CO<sub>2</sub> and N<sub>2</sub>O emissions from agricultural peatlands  
– a process-based modelling approach**

**Henri Kajasilta et al.**

*Correspondence to:* Henri Kajasilta (henri.kajasilta@fmi.fi)

The copyright of individual parts of the supplement might differ from the article licence.

## S1. Supplementary Figures

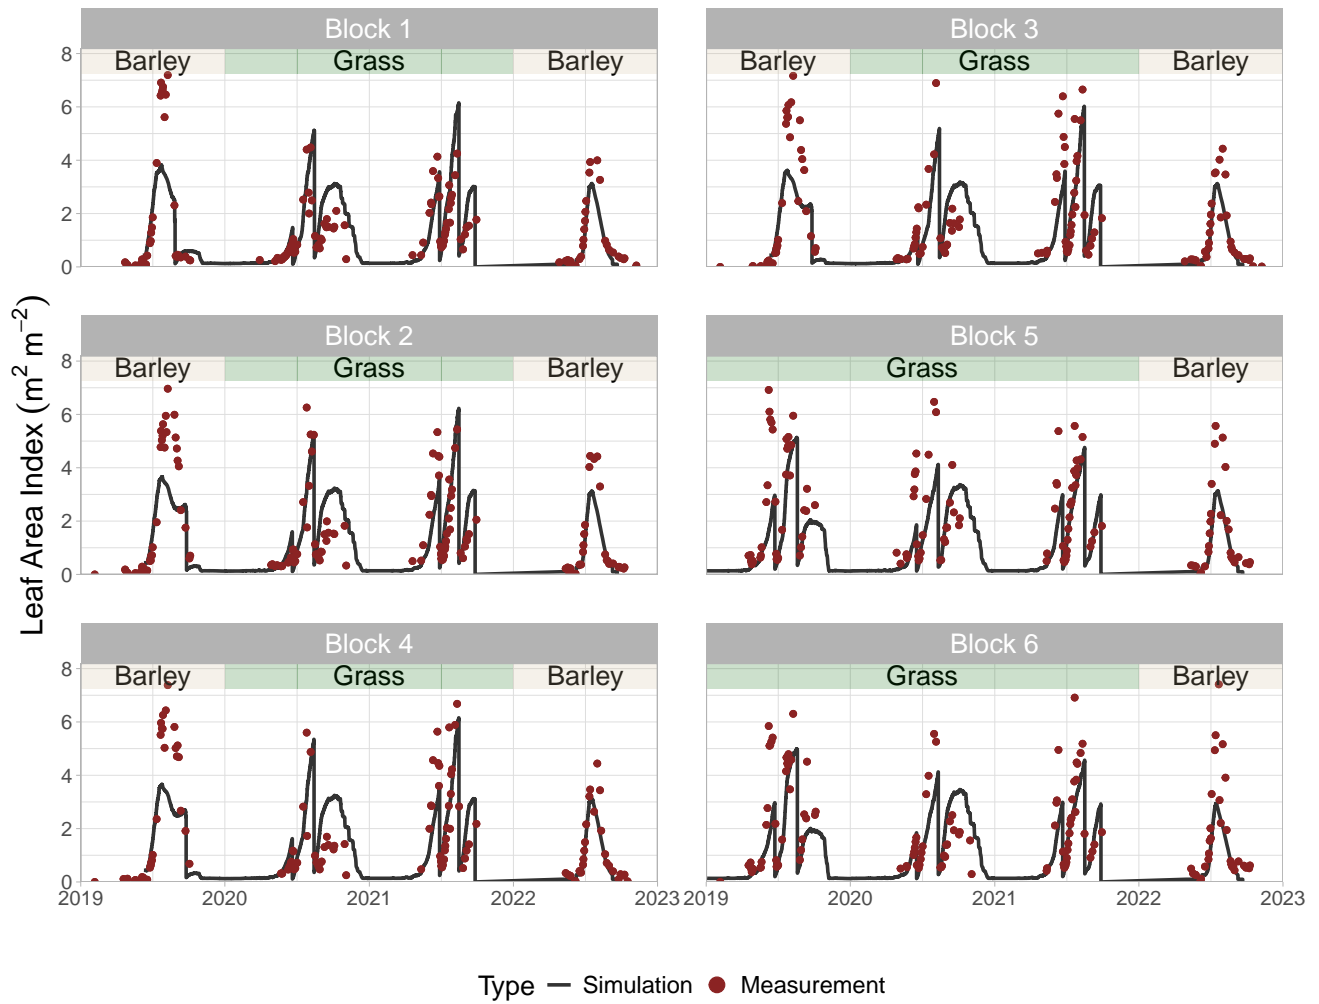

**Figure S1.** Leaf area index (LAI) in baseline scenarios.

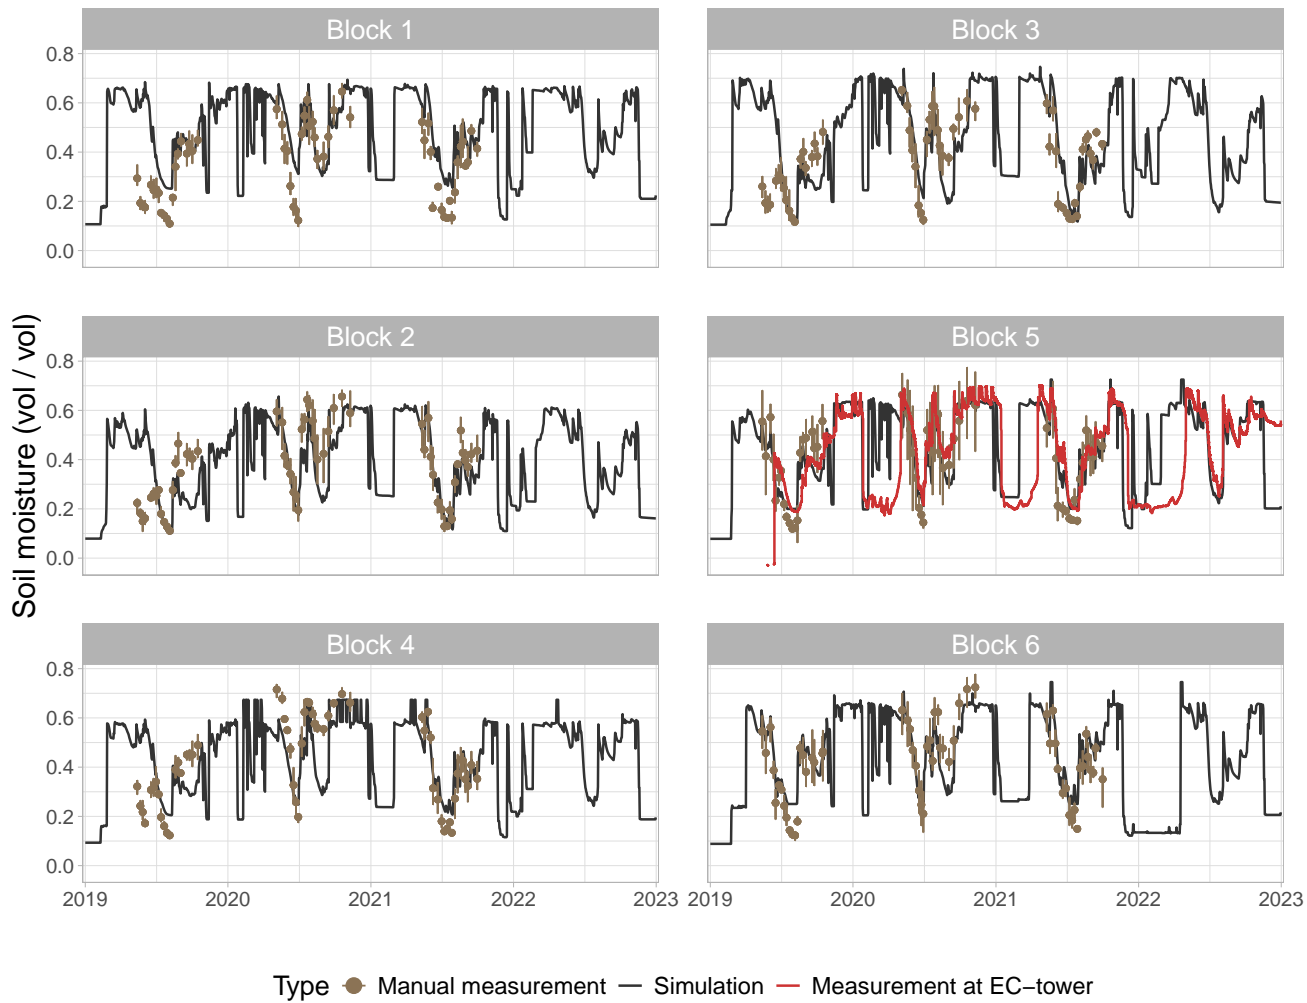

**Figure S2.** Soil moisture in baseline scenarios.

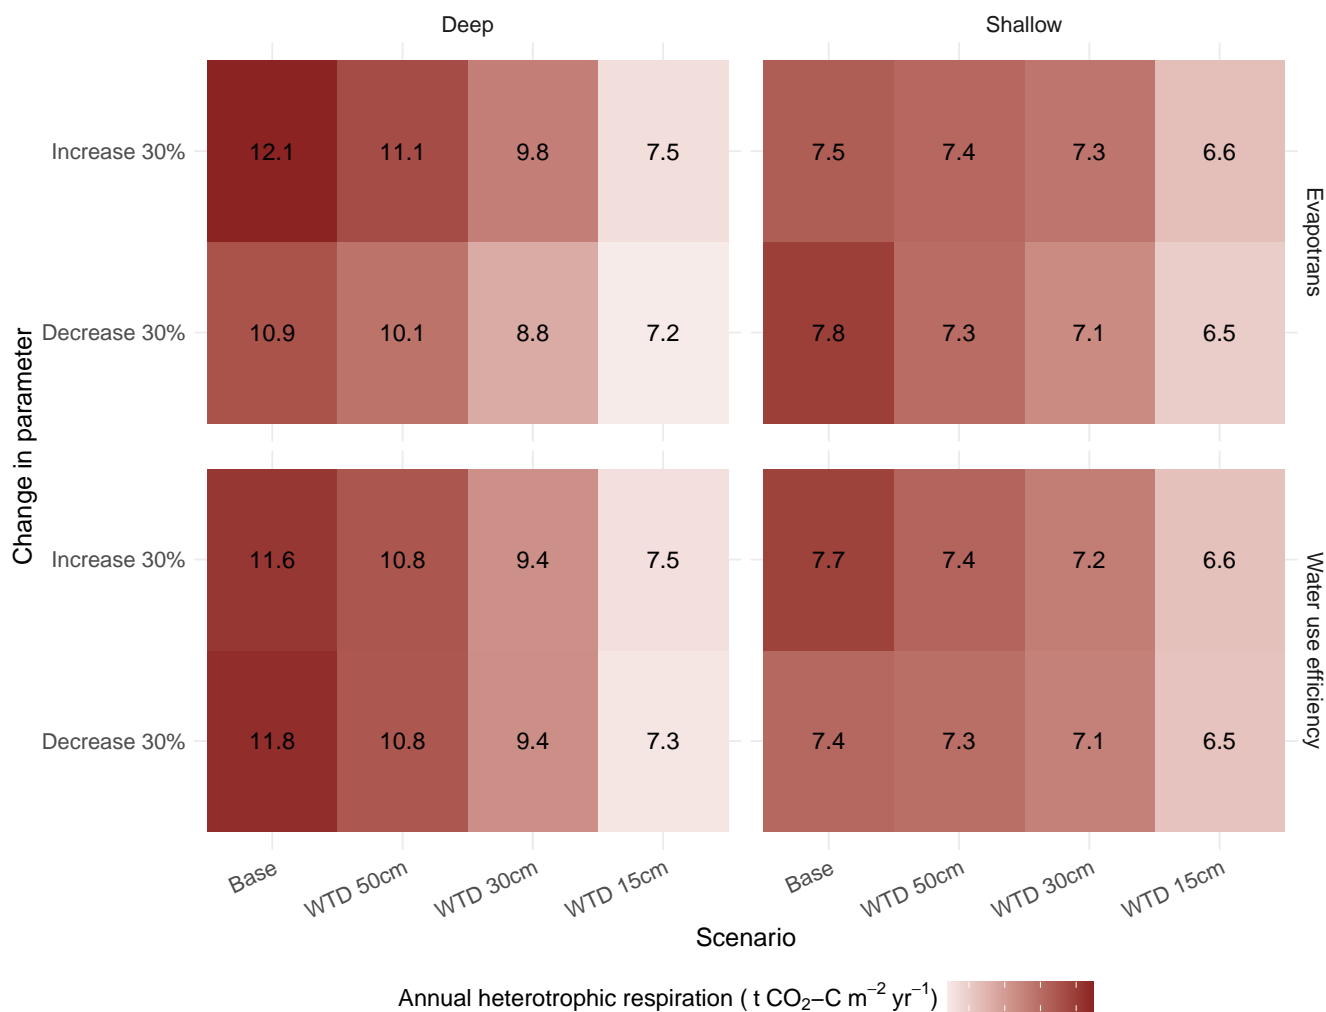

**Figure S3.** Average annual heterotrophic respiration in each water table depth (WTD) scenario for deep peat blocks (1,2,4) and shallow peat blocks (3,5,6) after changing potential evapotranspiration and water use efficiency parameters. In the baseline run the annual heterotrophic respiration was  $11.8 \text{ t CO}_2\text{-C ha}^{-1} \text{ yr}^{-1}$  for deep peat blocks,  $7.6 \text{ t CO}_2\text{-C ha}^{-1} \text{ yr}^{-1}$  and average of all blocks  $9.7 \text{ t CO}_2\text{-C ha}^{-1} \text{ yr}^{-1}$ .

## S2. Supplementary Tables

**Table S1.** Parameter values changed for the simulation runs and their differences to the default parameter values in the model. Parameters were selected to correct undesired model behavior and to enhance dynamics seen in the empirical observations. The modifications to decomposition rates (METRX\_KR\_DC\_HUM) were necessary to achieve representative emission levels, while modifications to GDD (required growing degree days for plant development) and senescence (maximum percentage of biomass being subject senescence due to age, drought or frost) parameters were crucial to replicate plants' seasonal dynamics in northern latitudes. Other parameters governed daily runoff from surface water (FRUNOFF), change in potential evapotranspiration (WCDNDC\_INCREASE\_POT\_EVAPOTRANS), albedo (ALB), relative available soil water content at which drought affects photosynthesis activity (H2OREF\_A), or stomata are fully closed (H2OREF\_GS), maximum instantaneous water use efficiency (WUECMAX), biomass fraction of fruit at maturity (FRACTION\_FRUIT), decline of specific leaf area with crop age (SLADECLINE) and specific leaf area in the shade (SLAMAX).

| Type             | Name                           | Value  | Default |
|------------------|--------------------------------|--------|---------|
| SITE             | FRUNOFF (time step dependent)  | 8      | 6       |
|                  | METRX_KR_DC_HUM2               | 1.4e-3 | 1.2e-3  |
|                  | METRX_KR_DC_HUM3               | 1.0e-3 | 2.5e-5  |
|                  | WCDNDC_INCREASE_POT_EVAPOTRANS | 1.7    | 1.0     |
| PERG             | ALB                            | 0.16   | 0.12    |
|                  | H2OREF_A                       | 1e-6   | 0.65    |
|                  | H2OREF_GS                      | 1e-6   | 0.33    |
|                  | SENESCENCE_AGE                 | 7e-4   | 1e-2    |
|                  | SENESCENCE_DROUGHT             | 5e-5   | 1e-2    |
|                  | SENESCENCE_FROST               | 0.9    | 1e-2    |
| SBAR             | WUECMAX                        | 14     | 5.3     |
|                  | GDD_FLOWERING                  | 650    | 910     |
|                  | GDD_GRAIN_FILLING              | 780    | 930     |
|                  | GDD_MATURITY                   | 1350   | 1660    |
|                  | FRACTION_FRUIT                 | 0.66   | 0.5     |
|                  | SLADECLINE                     | 0.65   | 0       |
|                  | SLAMAX                         | 20     | 27      |
|                  | SENESCENCE_AGE                 | 7.4e-2 | 0       |
|                  | SENESCENCE_DROUGHT             | 6.5e-2 | 0       |
| SENESCENCE_FROST | 2.1e-2                         | 0      |         |

**Table S2.** Simulated autotrophic (Ra), heterotrophic (Rh) and total respiration (TER) together with gross primary production (GPP) at the different blocks during 2019-2022. Carbon related values are t CO<sub>2</sub>-C ha<sup>-1</sup> yr<sup>-1</sup> and unit of N<sub>2</sub>O is kg N<sub>2</sub>O-N ha<sup>-1</sup> yr<sup>-1</sup>.

| Block | Year | Ra   | Rh    | TER   | GPP   | N <sub>2</sub> O |
|-------|------|------|-------|-------|-------|------------------|
| 1     | 2019 | 4.26 | 11.41 | 15.68 | 8.99  | 15.33            |
| 1     | 2020 | 6.76 | 11.32 | 18.08 | 12.90 | 27.56            |
| 1     | 2021 | 7.31 | 10.88 | 18.18 | 14.16 | 22.29            |
| 1     | 2022 | 3.68 | 11.60 | 15.28 | 7.97  | 20.05            |
| 2     | 2019 | 4.80 | 12.64 | 17.44 | 9.90  | 31.68            |
| 2     | 2020 | 7.01 | 13.05 | 20.06 | 13.34 | 51.72            |
| 2     | 2021 | 7.47 | 12.08 | 19.55 | 14.49 | 30.60            |
| 2     | 2022 | 3.68 | 13.81 | 17.50 | 7.99  | 27.70            |
| 3     | 2019 | 4.44 | 6.45  | 10.89 | 9.17  | 11.10            |
| 3     | 2020 | 6.79 | 7.33  | 14.12 | 12.97 | 14.67            |
| 3     | 2021 | 7.21 | 6.39  | 13.60 | 14.04 | 12.68            |
| 3     | 2022 | 3.62 | 8.35  | 11.97 | 7.81  | 12.41            |
| 4     | 2019 | 4.82 | 11.96 | 16.78 | 9.88  | 19.34            |
| 4     | 2020 | 7.05 | 10.82 | 17.88 | 13.42 | 26.68            |
| 4     | 2021 | 7.39 | 11.47 | 18.85 | 14.34 | 20.96            |
| 4     | 2022 | 3.67 | 10.93 | 14.60 | 7.96  | 14.71            |
| 5     | 2019 | 6.22 | 7.41  | 13.63 | 11.81 | 8.49             |
| 5     | 2020 | 7.29 | 7.66  | 14.95 | 13.65 | 10.00            |
| 5     | 2021 | 6.75 | 7.22  | 13.97 | 12.97 | 6.39             |
| 5     | 2022 | 3.67 | 8.67  | 12.34 | 7.95  | 11.87            |
| 6     | 2019 | 6.08 | 8.04  | 14.11 | 11.55 | 13.73            |
| 6     | 2020 | 7.24 | 8.13  | 15.37 | 13.59 | 21.51            |
| 6     | 2021 | 6.54 | 7.64  | 14.18 | 12.60 | 11.66            |
| 6     | 2022 | 2.96 | 8.33  | 11.29 | 6.15  | 6.85             |

**Table S3.** Simulated NEE, N<sub>2</sub>O and NECB values for shallow and deep peat blocks.

| Peat depth | Scenario  | Year | NEE (t CO <sub>2</sub> -C ha <sup>-1</sup> ) | N <sub>2</sub> O (kg N <sub>2</sub> O-N ha <sup>-1</sup> ) | NECB (t CO <sub>2</sub> -C ha <sup>-1</sup> ) |
|------------|-----------|------|----------------------------------------------|------------------------------------------------------------|-----------------------------------------------|
| Shallow    | Baseline  | 2019 | 2.04                                         | 11.10                                                      | 4.88                                          |
| Shallow    | Baseline  | 2020 | 1.41                                         | 15.39                                                      | 4.15                                          |
| Shallow    | Baseline  | 2021 | 0.71                                         | 10.24                                                      | 4.42                                          |
| Shallow    | Baseline  | 2022 | 4.56                                         | 10.38                                                      | 5.89                                          |
| Shallow    | WTD 50 cm | 2019 | 1.19                                         | 10.89                                                      | 4.23                                          |
| Shallow    | WTD 50 cm | 2020 | 0.83                                         | 12.14                                                      | 3.64                                          |
| Shallow    | WTD 50 cm | 2021 | -0.15                                        | 7.01                                                       | 3.67                                          |
| Shallow    | WTD 50 cm | 2022 | 5.04                                         | 6.97                                                       | 6.28                                          |
| Shallow    | WTD 30 cm | 2019 | 0.94                                         | 10.16                                                      | 4.11                                          |
| Shallow    | WTD 30 cm | 2020 | 0.32                                         | 10.70                                                      | 3.18                                          |
| Shallow    | WTD 30 cm | 2021 | -0.58                                        | 4.23                                                       | 3.28                                          |
| Shallow    | WTD 30 cm | 2022 | 4.86                                         | 6.49                                                       | 6.11                                          |
| Shallow    | WTD 15 cm | 2019 | 0.23                                         | 9.76                                                       | 3.57                                          |
| Shallow    | WTD 15 cm | 2020 | -0.30                                        | 6.73                                                       | 2.61                                          |
| Shallow    | WTD 15 cm | 2021 | -0.73                                        | 2.88                                                       | 3.18                                          |
| Shallow    | WTD 15 cm | 2022 | 2.99                                         | 4.24                                                       | 4.47                                          |
| Deep       | Baseline  | 2019 | 7.04                                         | 22.12                                                      | 9.31                                          |
| Deep       | Baseline  | 2020 | 5.45                                         | 35.32                                                      | 8.29                                          |
| Deep       | Baseline  | 2021 | 4.53                                         | 24.62                                                      | 8.60                                          |
| Deep       | Baseline  | 2022 | 7.82                                         | 20.82                                                      | 9.28                                          |
| Deep       | WTD 50 cm | 2019 | 5.85                                         | 22.29                                                      | 8.50                                          |
| Deep       | WTD 50 cm | 2020 | 3.03                                         | 26.05                                                      | 5.91                                          |
| Deep       | WTD 50 cm | 2021 | 3.25                                         | 18.56                                                      | 7.34                                          |
| Deep       | WTD 50 cm | 2022 | 7.95                                         | 18.99                                                      | 9.42                                          |
| Deep       | WTD 30 cm | 2019 | 4.66                                         | 23.78                                                      | 7.58                                          |
| Deep       | WTD 30 cm | 2020 | 1.36                                         | 19.44                                                      | 4.32                                          |
| Deep       | WTD 30 cm | 2021 | 1.12                                         | 10.87                                                      | 5.26                                          |
| Deep       | WTD 30 cm | 2022 | 6.27                                         | 13.69                                                      | 7.74                                          |
| Deep       | WTD 15 cm | 2019 | 1.71                                         | 19.97                                                      | 4.76                                          |
| Deep       | WTD 15 cm | 2020 | -0.04                                        | 9.04                                                       | 3.00                                          |
| Deep       | WTD 15 cm | 2021 | -0.70                                        | 4.12                                                       | 3.46                                          |
| Deep       | WTD 15 cm | 2022 | 3.85                                         | 8.76                                                       | 5.32                                          |

**Table S4.** Annual NEE and N<sub>2</sub>O from EC measurements. NECB calculated by the sum of NEE and carbon from harvest as no manure was applied in years 2020–2022.

| Year | NEE (t CO <sub>2</sub> -C ha <sup>-1</sup> ) | N <sub>2</sub> O (kg N <sub>2</sub> O-N ha <sup>-1</sup> ) | NECB (t CO <sub>2</sub> -C ha <sup>-1</sup> ) |
|------|----------------------------------------------|------------------------------------------------------------|-----------------------------------------------|
| 2020 | 1.06                                         | 4.74                                                       | 4.29                                          |
| 2021 | 1.79                                         | 6.09                                                       | 5.51                                          |
| 2022 | 5.12                                         | 13.0                                                       | 6.91                                          |

**Table S5.** Soil-related parameters used in the simulations: bulk density (bd; kg dm<sup>-3</sup>), pH, organic carbon content (corg; g g<sup>-1</sup>), nitrogen content (norg; g g<sup>-1</sup>),  $\alpha$  and  $n$  as used in the van Genuchten functions for water retention curves, saturated hydraulic conductivity (sks; cm min<sup>-1</sup>), porosity (m<sup>3</sup> m<sup>-3</sup>), silt content (g g<sup>-1</sup>), and minimum water filled pore space (m<sup>3</sup> m<sup>-3</sup>). The layer split indicates how many sublayers each initialised layer contains with similar attributes. The initialisation of C and N pools is based on extrapolating the C and N contents measured in Yli-Halla et al. (2022, supplement) to the beginning of the spin-up simulation. The extrapolated carbon and nitrogen amounts are distributed into the topmost soil layers to account the depletion during spin-up years. The hydrological parameters were iteratively determined relying on literature values and the model response compared to the observed values on the site.

| Block | Stratum | Stratum(mm) | Layers(num) | bd    | pH  | corg   | norg   | alpha | n    | sks     | porosity | silt | wfpsmin |
|-------|---------|-------------|-------------|-------|-----|--------|--------|-------|------|---------|----------|------|---------|
| 1     | 1       | 200         | 10          | 0.475 | 5.8 | 0.258  | 0.014  | 0.785 | 1.4  | 0.004   |          |      | 0.23    |
| 1     | 2       | 300         | 10          | 0.21  | 5.8 | 0.594  | 0.030  | 0.975 | 1.3  | 0.004   | 0.7      |      | 0.21    |
| 1     | 3       | 100         | 2           | 0.15  | 5.8 | 0.715  | 0.037  | 3     | 1.4  | 0.004   | 0.7      |      | 0.3     |
| 1     | 4       | 100         | 2           | 1.64  | 4.9 | 0.01   | 0.0007 | 4.5   | 1.35 | 0.004   | 0.48     | 0.7  | 0.25    |
| 1     | 5       | 300         | 5           | 1.35  | 4.4 | 0.007  | 0.0004 |       |      |         | 0.41     | 0.7  |         |
| 1     | 6       | 1000        | 10          | 1.32  | 4.9 | 0.01   | 0.0008 |       |      |         |          | 0.7  |         |
| 2     | 1       | 200         | 10          | 0.49  | 5.6 | 0.344  | 0.021  | 0.795 | 1.4  | 0.004   |          |      |         |
| 2     | 2       | 200         | 10          | 0.22  | 5.6 | 0.607  | 0.033  | 0.925 | 1.3  | 0.004   |          |      |         |
| 2     | 3       | 100         | 4           | 0.81  | 5.2 | 0.083  | 0.0049 | 6     | 1.5  | 0.004   |          |      |         |
| 2     | 4       | 100         | 2           | 1.63  | 4.9 | 0.006  | 0.0006 | 6     | 1.5  | 0.004   | 0.39     | 0.7  |         |
| 2     | 5       | 400         | 4           | 1.63  | 4.9 | 0.01   | 0.0005 |       |      | 0.004   |          | 0.7  |         |
| 2     | 6       | 200         | 2           | 1.65  | 4.9 | 0.025  | 0.0012 |       |      |         |          | 0.7  |         |
| 2     | 7       | 800         | 4           | 1.32  | 4.9 | 0.008  | 0.0005 |       |      |         |          | 0.7  |         |
| 3     | 1       | 200         | 10          | 0.36  | 5.8 | 0.258  | 0.015  | 0.795 | 1.4  | 0.004   |          |      |         |
| 3     | 2       | 100         | 10          | 0.89  | 5.8 | 0.088  | 0.0050 | 0.925 | 1.3  | 0.004   |          |      |         |
| 3     | 3       | 300         | 10          | 1.63  | 4.9 | 0.005  | 0.0002 | 6     | 1.5  | 0.004   | 0.38     | 0.7  |         |
| 3     | 4       | 400         | 10          | 1.41  | 4.4 | 0.003  | 0.0002 |       |      | 0.002   | 0.5      | 0.7  |         |
| 3     | 5       | 600         | 10          | 1.27  | 4.4 | 0.008  | 0.0007 |       |      |         |          | 0.7  |         |
| 3     | 6       | 400         | 10          | 1.32  | 4.9 | 0.013  | 0.0008 |       |      |         |          | 0.7  |         |
| 4     | 1       | 300         | 15          | 0.62  | 5.6 | 0.268  | 0.016  | 0.795 | 1.4  | 0.0045  |          |      | 0.2     |
| 4     | 2       | 200         | 10          | 0.23  | 5.6 | 0.522  | 0.028  | 0.825 | 1.3  | 0.004   |          |      | 0.2     |
| 4     | 3       | 100         | 4           | 1.63  | 5.2 | 0.002  | 0.0004 | 6     | 1.5  | 0.004   | 0.4      |      | 0.3     |
| 4     | 4       | 400         | 10          | 1.41  | 4.9 | 0.007  | 0.0003 |       |      | 0.005   |          |      | 0.3     |
| 4     | 5       | 600         | 10          | 1.27  | 4.9 | 0.012  | 0.0006 |       |      |         |          |      | 0.3     |
| 4     | 6       | 400         | 5           | 1.32  | 4.9 | 0.007  | 0.0006 |       |      |         |          |      | 0.3     |
| 5     | 1       | 100         | 5           | 0.61  | 6.1 | 0.301  | 0.017  | 0.75  | 1.4  | 0.0045  |          | 0.7  | 0.16    |
| 5     | 2       | 100         | 5           | 0.21  | 6.1 | 0.471  | 0.029  | 0.95  | 1.3  | 0.0045  |          | 0.7  |         |
| 5     | 3       | 100         | 4           | 1.62  | 5.6 | 0.0062 | 0.0006 | 6     | 1.4  | 0.004   |          |      |         |
| 5     | 4       | 100         | 4           | 1.33  | 5.4 | 0.0024 | 0.0002 | 6     | 1.5  | 0.00054 | 0.45     | 0.7  |         |
| 5     | 5       | 400         | 10          | 1.33  | 4.9 | 0.0024 | 0.0002 |       |      | 0.00045 |          | 0.7  |         |
| 5     | 6       | 200         | 4           | 1.33  | 4.4 | 0.0024 | 0.0002 |       |      | 0.00045 |          | 0.7  |         |
| 5     | 7       | 800         | 8           | 1.48  | 4.4 | 0.0054 | 0.0004 |       |      |         |          | 0.7  |         |
| 5     | 8       | 200         | 2           | 1.32  | 4.4 | 0.0063 | 0.0004 |       |      |         |          | 0.7  |         |
| 6     | 1       | 100         | 5           | 0.696 | 6   | 0.219  | 0.011  | 0.8   | 1.35 | 0.0025  | 0.72     |      | 0.2     |
| 6     | 2       | 100         | 4           | 0.644 | 6   | 0.223  | 0.011  | 0.975 | 1.20 | 0.0025  |          |      | 0.2     |
| 6     | 3       | 100         | 2           | 1.65  | 6   | 0.01   | 0.0009 | 6     | 1.46 | 0.004   | 0.45     | 0.6  | 0.3     |
| 6     | 4       | 700         | 7           | 1.33  | 5   | 0.003  | 0.0002 | 2     | 1.35 | 0.0005  | 0.4      | 0.7  | 0.2     |
| 6     | 5       | 900         | 3           | 1.48  | 4   | 0.004  | 0.0001 | 2     | 1.35 | 0.002   | 0.4      | 0.7  | 0.2     |
| 6     | 6       | 100         | 1           | 1.32  | 5   | 0.005  | 0.0003 | 2     | 1.35 | 0.002   |          | 0.7  | 0.2     |

**Table S6.** Statistics for soil moisture and leaf area index (LAI). Simulated soil moisture was compared with manual chamber measurements (2019–2021), and simulated LAI with satellite observations (2019–2022).

| Block | Soil moisture                   |                | Leaf area index |
|-------|---------------------------------|----------------|-----------------|
|       | NSE (Nash Sutcliffe Efficiency) | R <sup>2</sup> | R <sup>2</sup>  |
| 1     | -0.24                           | 0.43           | 0.61            |
| 2     | 0.30                            | 0.39           | 0.64            |
| 3     | 0.06                            | 0.36           | 0.66            |
| 4     | 0.40                            | 0.40           | 0.63            |
| 5     | 0.75                            | 0.75           | 0.64            |
| 6     | 0.66                            | 0.69           | 0.57            |

**Table S7.** Monthly and yearly total precipitation and air temperature mean from January 2019 to December 2022 in comparison to the long term average of 1991-2020 (Jokinen et al. 2021).

| Time period | Total precipitation (mm) |      |      |      |           | Air temperature mean (°C) |      |       |      |           |
|-------------|--------------------------|------|------|------|-----------|---------------------------|------|-------|------|-----------|
|             | 2019                     | 2020 | 2021 | 2022 | 1991-2020 | 2019                      | 2020 | 2021  | 2022 | 1991-2020 |
| January     | 22                       | 45   | 32   | 15   | 36        | -12.1                     | -1.9 | -10.0 | -7.6 | -8.0      |
| February    | 37                       | 69   | 35   | 56   | 30        | -6.0                      | -4.1 | -12.7 | -7.2 | -8.2      |
| March       | 44                       | 23   | 31   | 13   | 28        | -3.7                      | -1.9 | -3.9  | -2.7 | -4.0      |
| April       | 3                        | 14   | 53   | 24   | 24        | 4.2                       | 0.1  | 1.8   | 0.3  | 1.9       |
| May         | 60                       | 31   | 57   | 32   | 42        | 7.6                       | 6.0  | 7.5   | 8.1  | 8.0       |
| June        | 55                       | 37   | 45   | 58   | 53        | 14.3                      | 16.4 | 15.6  | 14.8 | 13.3      |
| July        | 2                        | 165  | 32   | 40   | 77        | 14.6                      | 14.3 | 17.7  | 16.0 | 16.2      |
| August      | 104                      | 30   | 127  | 121  | 70        | 13.7                      | 13.6 | 12.8  | 14.9 | 14.0      |
| September   | 44                       | 95   | 45   | 27   | 53        | 8.9                       | 9.7  | 7.3   | 7.7  | 9.0       |
| October     | 59                       | 92   | 87   | 69   | 54        | 2.0                       | 4.9  | 5.2   | 4.7  | 3.0       |
| November    | 56                       | 87   | 22   | 18   | 47        | -3.0                      | 1.5  | -2.8  | -1.7 | -1.6      |
| December    | 35                       | 44   | 14   | 42   | 42        | -2.0                      | -1.8 | -9.7  | -6.1 | -5.2      |
| Year        | 519                      | 732  | 580  | 514  | 555       | 3.2                       | 4.7  | 2.4   | 3.4  | 3.2       |

**Table S8.** Management event from 2019 and 2020.

| Block | Date       | Crop | Event                  | Additional information                                                                                       |
|-------|------------|------|------------------------|--------------------------------------------------------------------------------------------------------------|
| 5, 6  | 2019-05-13 | G    | Fertilization          | N80-P8-K48 kg/ha                                                                                             |
| 2     | 2019-06-02 | B    | Slurry                 | N57-P6-K51 kg/ha                                                                                             |
| 1     | 2019-06-06 | B    | Harrowing              |                                                                                                              |
| 1     | 2019-06-07 | B    | Sowing + Fertilization | Sowing density: 200kg/ha<br>Fert.: N57-P5.6-K33.6 kg/ha                                                      |
| 3     | 2019-06-08 | B    | Slurry                 | N57-P6-K51 kg/ha                                                                                             |
| 2-4   | 2019-06-10 | B    | Harrowing              |                                                                                                              |
| 2, 4  | 2019-06-10 | B    | Sowing + Fertilization | Sowing density: 200kg/ha<br>Fert. block 2: N27-P0-K1 kg/ha<br>Fert. block 4: N57-P5.6-K33.6 kg/ha            |
| 3     | 2019-06-11 | B    | Sowing + Fertilization | Sowing density: 200kg/ha<br>Fert. block 2: N27-P0-K1 kg/ha                                                   |
| 1-4   | 2019-06-13 | B    | Rolling                |                                                                                                              |
| 5, 6  | 2019-06-24 | G    | Harvest                | Block 5: 6871.2 kg DW/ha<br>Block 6: 5486.1 kg DW/ha                                                         |
| 5, 6  | 2019-07-05 | G    | Fertilization          | N51.48-P0-K53 kg/ha                                                                                          |
| 5, 6  | 2019-08-20 | G    | Harvest                | Block 5: 4250.1 kg DW/ha<br>Field block 6: 4131.9 kg DW/ha                                                   |
| 1     | 2019-08-26 | B    | Harvest                | 8647.1 kg DW/ha                                                                                              |
| 4     | 2019-09-24 | G    | Harvest                | 4442.5 kg DW/ha                                                                                              |
| 2, 3  | 2019-09-25 | B    | Harvest                | Block 2: 2449 kg DW/ha<br>Block 3: 3005.3 kg DW/ha                                                           |
| 6     | 2019-10-15 | G    | Slurry                 | N57-P6-K51 kg/ha                                                                                             |
| 1-6   | 2020-05-29 | G    | Fertilization          | N80-P8-K48 kg/ha                                                                                             |
| 5, 6  | 2020-06-17 | G    | Mowing + Harvest       | Block 5: 3934.3 kg DW/ha<br>Block 6: 4200.1 kg DW/ha                                                         |
| 1-4   | 2020-06-20 | G    | Mowing                 |                                                                                                              |
| 1-4   | 2020-06-24 | G    | Harvest                | Block 1: 1548.0 kg DW/ha<br>Block 2: 250.6 kg DW/ha<br>Block 3: 1778.4 kg DW/ha<br>Block 4: 1267.6 kg DW/ha  |
| 1-6   | 2020-06-30 | G    | Fertilization          | N66-P0-K36 kg/ha                                                                                             |
| 5, 6  | 2020-08-11 | G    | Mowing                 |                                                                                                              |
| 5, 6  | 2020-08-12 | G    | Harvest                | Block 5: 3473.7 kg DW/ha<br>Block 6: 3420.9 kg DW/ha                                                         |
| 1-4   | 2020-08-14 | G    | Mowing                 |                                                                                                              |
| 1-4   | 2020-08-21 | G    | Harvest                | Block 1: 4178.3 kg DW/ha<br>Block 2: 6673.4 kg DW/ha<br>Block 3: 5180.7 kg DW/ha<br>Block 4: 5458.5 kg DW/ha |

**Table S9.** Management event from 2021 and 2022.

| Block | Date       | Crop | Event                  | Additional information                                                                                                                                               |
|-------|------------|------|------------------------|----------------------------------------------------------------------------------------------------------------------------------------------------------------------|
| 1-6   | 2021-05-26 | G    | Fertilization          | N70-P7-K42 kg/ha                                                                                                                                                     |
| 5, 6  | 2021-06-22 | G    | Mowing + Harvest       | Block 5: 5055.7 kg DW/ha<br>Block 6: 4613.1 kg DW/ha                                                                                                                 |
| 1-4   | 2021-06-28 | G    | Mowing                 |                                                                                                                                                                      |
| 1-4   | 2021-07-02 | G    | Baling                 | Block 1: 6240.8 kg DW/ha<br>Block 2: 5885.8 kg DW/ha<br>Block 3: 6455.0 kg DW/ha<br>Block 4: 5422.2 kg DW/ha                                                         |
| 1-6   | 2021-07-07 | G    | Fertilization 2        | N66-P0-K36 kg/ha                                                                                                                                                     |
| 1-4   | 2021-08-16 | G    | Mowing 2               |                                                                                                                                                                      |
| 5, 6  | 2021-08-17 | G    | Mowing + Harvest       | Block 5: 3966 kg DW/ha<br>Block 6: 3616.8 kg DW/ha                                                                                                                   |
| 1-4   | 2021-08-17 | G    | Harvest                | Block 1: 5264.3 kg DW/ha<br>Block 2: 3935.6 kg DW/ha<br>Block 3: 5280.6 kg DW/ha<br>Block 4: 4039.1 kg DW/ha                                                         |
| 5, 6  | 2021-09-26 | G    | Herbicide              | Glyphosate                                                                                                                                                           |
| 1-4   | 2021-09-27 | G    | Herbicide              | Glyphosate                                                                                                                                                           |
| 1-6   | 2021-11-15 | G    | Ditch work             | Ended on 2021-11-15                                                                                                                                                  |
| 6     | 2022-06-01 | B    | Ploughing              |                                                                                                                                                                      |
| 5     | 2022-06-02 | B    | Ploughing              |                                                                                                                                                                      |
| 3, 4  | 2022-06-04 | B    | Ploughing              |                                                                                                                                                                      |
| 1, 2  | 2022-06-05 | B    | Ploughing              |                                                                                                                                                                      |
| 1-4   | 2022-06-09 | B    | Sowing + Fertilization | Sowing density: 200kg/ha<br>Fert.: N60 - P6 - K36 kg/ha                                                                                                              |
| 5, 6  | 2022-06-10 | B    | Sowing + Fertilization | Sowing density: 200kg/ha<br>Fert.: N60 - P6 - K36 kg/ha                                                                                                              |
| 3-6   | 2022-07-05 | B    | Herbicide              | Tribenuron-methyl                                                                                                                                                    |
| 1, 2  | 2022-07-06 | B    | Herbicide              | Tribenuron-methyl                                                                                                                                                    |
| All   | 2022-09-09 | B    | Harvest                | Block 1: 5275.3 kg DW/ha<br>Block 2: 4349.6 kg DW/ha<br>Block 3: 5038.0 kg DW/ha<br>Block 4: 4986.1 kg DW/ha<br>Block 5: 4177.5 kg DW/ha<br>Block 6: 4140.6 kg DW/ha |
| All   | 2022-09-21 | B    | Herbicide              | Glyphosate                                                                                                                                                           |
| 5, 6  | 2022-10-11 | B    | Ploughing              | Ended on 2022-10-11                                                                                                                                                  |
| 1-4   | 2022-10-12 | B    | Ploughing              | Ended on 2022-10-14                                                                                                                                                  |
